# Supplementary material for: Virtual Screening of Alkaloid and Terpenoid Inhibitors of SMT Expressed in Naegleria sp.
Source: MDPI journal article supplement (doi:10.3390/molecules27175727), 2022-09-05
Supplement: s1 [file s1]

**Table S1. Amino acid sequence comparison and percentage identity using ClustalW, Emboss Needle alignment for Yeast, XM, XP.** Alignment studies and amino acid comparison for Three protein sequences and the Swiss-model sequences.

| YEAST vs XM<br>complete protein<br>vs XP complete<br>protein | Percent Identity Matrix - created by Clustal2.1              |             |                     |                           |
|--------------------------------------------------------------|--------------------------------------------------------------|-------------|---------------------|---------------------------|
|                                                              | 1: YEAST                                                     | 100.00      | 40.69               | 41.33                     |
|                                                              | 2: XM_COMPLETE                                               | 40.69       | 100.00              | 77.56                     |
|                                                              | 3: XP_COMPLETE                                               | 41.33       | 77.56               | 100.00                    |
| YEAST                                                        | -----MSETELRKRQAQFTRELHGDDIGKKTGLSALMSKNNSAQKEAVQKYLRNW      |             |                     |                           |
| XM_COMPLETE                                                  | MSLFLLGVSIVVIGFVVYLFKFKNQIKGYHL-----TNENVGTGYQDLF---         |             |                     |                           |
| XP_COMPLETE                                                  | --MFLI-ILTVIVGGFILYLFKFKREQIKGSHL-----TDDKTASYQELF---        |             |                     |                           |
|                                                              | :                                                            | :           | :*::*: :            | :. :.*.:                  |
| YEAST                                                        | DGRDTKDAEERRLEDYNEATHSYYNVVTDFYEYVGWSSFHFSRFYKGESFAASIRHEHY  |             |                     |                           |
| XM_COMPLETE                                                  | -AQDTKDTHDKRKNAGWDVAGKYDDMTDFYLYGWGRSFHFAPRHKKESMIESIQRHEYW  |             |                     |                           |
| XP_COMPLETE                                                  | -ATDNQQTHEKRKKAGWDVAGKYDDMTDFYLYGWGRSFHFATRHSRESLIESILRHEYW  |             |                     |                           |
|                                                              | .                                                            | :::.* :     | ..:.*::***** **     | :. **.* **:::             |
| YEAST                                                        | LAYKAGIQRGDLVLDVGCVGVPAREIARFTGCNVIGLNNNDYQIAKAKYYAKKYNLSQD  |             |                     |                           |
| XM_COMPLETE                                                  | LAKQMDLKKGMKCLDLGCGVMGPATNISRFTGAHITGVNNHPYQSQAKEYISQMGLSEQ  |             |                     |                           |
| XP_COMPLETE                                                  | LAKQLDLKPGMKCLDLGCGVMGPVNIARFSGCNVTGVNNHPYQSERAKVFINEMGMDGR  |             |                     |                           |
|                                                              | ** :                                                         | ..: *       | **.*::*** **        | .*::***. ** .** :. :. . . |
| YEAST                                                        | MDFVKGDFMKM---DFEENTFDKVYAEIATCHAPKLEGVSEIYKVLKPGGTFAVYEWV   |             |                     |                           |
| XM_COMPLETE                                                  | CQIVRGDFNNLDDNSDLPSESDAAYTIEASCHAKDRPHCYKQIYNLKPGAIFAGYEWV   |             |                     |                           |
| XP_COMPLETE                                                  | CNIVRGDFNNLDDNKDLPAESYDAAYAIEATCHAKDRPHCYKQIFNKLKPGAVFGGYEWV |             |                     |                           |
|                                                              | ::.*::                                                       | .. :        | *: :.*.*::***.      | *.::*: **.* **            |
| YEAST                                                        | M-TDKYDENNPEHRKIAYEIELGKGIPKMFHVDVARKALKKNCGEVLVSEDLADND--DE |             |                     |                           |
| XM_COMPLETE                                                  | MISGKYDSKNEEHNKIKFDIMKGDGLPEILMDKEIDESLRKAGFEVKTEDVGVTQDIHP  |             |                     |                           |
| XP_COMPLETE                                                  | MITGKYDSKNEEHNKIKFDIMKGDGLPEILMDKEIDDALVKAGFEVIRTEDAVITDKINP |             |                     |                           |
|                                                              | * :.*::.* **.*                                               | ::* **.*::: | . :.* :.*::: :.*::. | *                         |
| YEAST                                                        | IPWYYPL-TGEWKYVQNLANLATFFRTSYLGRQFTTAMVTVMKLLGLAPEGSKEVTAALE |             |                     |                           |
| XM_COMPLETE                                                  | VPWYQPIDNGGW-----DFTSWFQTSY-GRFIVHKLVGILESVLGVPKSSQAYEFLLM   |             |                     |                           |
| XP_COMPLETE                                                  | IPWYQPLDNGGW-----ELTNWFQTSY-GRWVVHKLVGILEKIGLVPKTSQQAYEFLLM  |             |                     |                           |
|                                                              | :*** *                                                       | :* *        | ::::.*.* ** . :     | :*:::.*.*.*: :.* *        |
| YEAST                                                        | NAAVGLVAGGSKLFTPMMLFVARKPENAEPSQTSQEATQ                      |             |                     |                           |
| XM_COMPLETE                                                  | AGASGLVAGGKTGIFTPCYFFMARKPLTAEE-----                         |             |                     |                           |
| XP_COMPLETE                                                  | AGA-GLVGGGKTGIFTPSYFFLARKPLKN-----                           |             |                     |                           |
|                                                              | .*                                                           | ***.*:::    | :*** :.*::***.      | .                         |

Yeast vs XM Swiss-model vs XP Swiss-model

## Percent Identity Matrix - created by Clustal2.1

|             |        |        |        |
|-------------|--------|--------|--------|
| 1: YEAST    | 100.00 | 44.03  | 45.78  |
| 2: XM_SWISS | 44.03  | 100.00 | 80.88  |
| 3: XP_SWISS | 45.78  | 80.88  | 100.00 |

|          |                                                              |
|----------|--------------------------------------------------------------|
| YEAST    | MSETELRKRQAQFTRELHGDDIGKKTGLSALMSKNNSAQKEAVQKYLNRWDGRTDKDAEE |
| XM_SWISS | -----                                                        |
| XP_SWISS | -----                                                        |

|          |                                                             |
|----------|-------------------------------------------------------------|
| YEAST    | RRLEDYNEATHSYYNVVTDFEYEGWGSSFHFSRFYKGESFAASIRHEHYLAYKAGIQRG |
| XM_SWISS | -----DLKKG                                                  |
| XP_SWISS | -----KQLDLKPG                                               |

.: : \*

|          |                                                              |
|----------|--------------------------------------------------------------|
| YEAST    | DLVLDVGCVGVPAREIARFTGCNVLNNNDYQIAKAKYYAKKYNLSDQMDVFKGDFMK    |
| XM_SWISS | MKCLDLGCGVMGPATNISRFTGAHITGVNNHPYQSQAKEYISQMGLEQCQIVRGDFNN   |
| XP_SWISS | MKCLDLGCGVMGPAVNIARFSGCNVTGVNNHPYQSERAKVFINEMGMDGRCNIVRGDFNN |

\*:\*\*\* \*\* :\*:\*:\*.:.: \*:\*: \*\* .\*\* : .: .:. . :\*:\*\*\* :

|          |                                                              |
|----------|--------------------------------------------------------------|
| YEAST    | M----DFEENTFDKVYAIEATCHAPKLEGVYSEIYKVLKPGGTFAVYEWVM-TDKYDENN |
| XM_SWISS | LDDNSDLPSESYDAAYTIEASCHAKDRPHCYKQIYNKLPKGAIFAGYEWVMISGKYDSKN |
| XP_SWISS | LDDNKDLPAESYDAAYAIEATCHAKDRPHCYKQIFNKLKPGAVFGGYEWVMITGKYDSKN |

: \* : :\*: \*.\*\*\*:\*\*\* . \*:\*: \*\*\*. \* \*\*\*\*\* :\*\*\*.\*

|          |                                                              |
|----------|--------------------------------------------------------------|
| YEAST    | PEHRKIAYEIELGDGIPKMFHVDVARKALKNCGFVLSVSEDLADND--DEIPWYYPL-TG |
| XM_SWISS | EEHNKIKFDIMKGDGLPEILMDKEIDSLRKAGFEVIKTEDVGVTQIHPVPWYQPIDNG   |
| XP_SWISS | EEHNKIKFDIMKGDGLPEILMDKEIDDALVKAGFEVIRTEDVAITDKINPIPWYQPLDNG |

\*\*.\* :\* \*\*\*:\*::. . :\* :.\*\*\*: \*\*: . \* :\*\*\* \*: \*

|          |                                                             |
|----------|-------------------------------------------------------------|
| YEAST    | EWKYVQNLANLATFFRTSYLGRQFTTAMVTVMKLGLAPEGSKEVTAALENAAVGLVAGG |
| XM_SWISS | GW-----DFTSWFQTSY-GRFIVHKLVGILESVGLVPKSSQAYEFLMAGASGLVAGG   |
| XP_SWISS | GW-----ELTNWFQTSY-GRWVVHKLVGILEKIGLVPKTSQAYEFLMAGAEGLVGGG   |

\* :\*:\*.\*\*\* \*\* .. :\* :\*:\*.\*\*\*: \*:.. \* .\* \*\*\*.\*

|          |                                  |
|----------|----------------------------------|
| YEAST    | KSKLFTPMMLFVARKPENAEPTPSQTSQEATQ |
| XM_SWISS | KTGIFTPCYFFMAR-----              |
| XP_SWISS | KTGIFTPSYFFLARKPL-----           |

\*: \*\*\* :\*:\*

**Table S2. Yeast Top ligand Binding pockets and their descriptions.**

| Pocket | Volume<br>[Å <sup>3</sup> ] | Drug<br>Score | Hydrogen<br>bond<br>donors | Hydrogen<br>bond<br>acceptors | Hydrophobic<br>interactions | Negative<br>amino acids | Positive<br>Amino acids |
|--------|-----------------------------|---------------|----------------------------|-------------------------------|-----------------------------|-------------------------|-------------------------|
| Orange | 1869.89                     | 0.81          | 31                         | 126                           | 19                          | 8                       | 7                       |
| Purple | 425.73                      | 0.6           | 15                         | 38                            | 21                          | 5                       | 4                       |
| Green  | 250.82                      | 0.46          | 8                          | 16                            | 16                          | 2                       | 2                       |

**Table S3. Pockets for yeast SMT and the amino acids involved.**

| Pocket | Amino acids involved                                                                                                                                                                                                                                                                                                                                                                                                                                                                                                                                                                                                                                 |
|--------|------------------------------------------------------------------------------------------------------------------------------------------------------------------------------------------------------------------------------------------------------------------------------------------------------------------------------------------------------------------------------------------------------------------------------------------------------------------------------------------------------------------------------------------------------------------------------------------------------------------------------------------------------|
| Orange | GLU3, LEU6, ARG7, GLN10, GLY27, LEU28, LEU31, MET32, GLN39, TYR66, ASN67, THR70, HIS71, TYR73, TYR74, VAL77, ASP79, PHE80, TYR83, TRP85, SER87, PHE89, HIS90, PHE91, SER92, PHE94, PHE100, ILE104, GLU 108, ASP125, VAL126, GLY127, CYS128, GLY129, VAL130, GLY131, GLY132, PRO133, LEU148, ASN149, ASN150, ASN151, GLN154, LYS175, GLY176, ASP177, PHE178, TYR192, ALA193, ILE194, GLU195, ALA196, CYS198, HIS199, ALA200, TRP225, GLY248, ASP249, ILE251, TRP286, PRO289, LEU290, ALA304, PHE307, ARG308, THR309, GLY313, ARG314, PHE 316, THR317, MET320, VAL321, MET324, ALA330, PRO331, SER334, VAL 337, THR338, LEU341, GLU342, ALA325, LEU348 |
| Purple | SER92, ARG93, PHE94, VAL226, THR228, ASP229, LYS230, VAL257, ARG261, ASP276, LEU277, ALA278, ASP279, ASN280, ASP281, ASP281, ILE284, PRO285, TRP286, TYR287, GLY351, GLY352, LYS355, LEU356, PHE357, THR358, MET360, MET361                                                                                                                                                                                                                                                                                                                                                                                                                          |
| Green  | TRP85, GLY86, SER87, SER88, PHE100, ALA101, ILE104, ALA105, GLU108, GLY132, ARG135, GLU136, TYR165, LEU165                                                                                                                                                                                                                                                                                                                                                                                                                                                                                                                                           |

**Table S4. XP Top ligand binding pockets and their descriptions**

| Pocket | Volume [Å <sup>3</sup> ] | Drug Score | Hydrogen bond donors | Hydrogen bond acceptors | Hydrophobic interactions | Negative amino acids | Positive Amino acids |
|--------|--------------------------|------------|----------------------|-------------------------|--------------------------|----------------------|----------------------|
| Orange | 576.58                   | 0.86       | 13                   | 46                      | 38                       | 4                    | 5                    |
| Purple | 516.35                   | 0.75       | 9                    | 45                      | 38                       | 2                    | 2                    |
| Green  | 113.98                   | 0.18       | 4                    | 16                      | 8                        | 2                    | 1                    |

**Table S5. Pockets for XP SMT and the amino acids involved.**

| Pocket | Amino acids involved                                                                                                                                                                                                              |
|--------|-----------------------------------------------------------------------------------------------------------------------------------------------------------------------------------------------------------------------------------|
| Orange | ASP116, LEU117, GLY118, CYS 119, GLY120, PRO124, VAL139, ASN140, HIS142, GLN145, GLY149, ASP168, PHE169, ASN170, ASN171, LYS73176, ALA188, ILE189, GLU190, ALA191, THR192, HIS194, ALA195, ASP197, HIS200, CYS201, GLN204, LYS208 |
| Purple | TRP220, VAL221, MET222, ILE223, ASP228, SER229, LYS230, ASN231, GLU233, HIS234, ASN235, ILE241, MET242, ILE250, TYR 285, GLN286, LEU339, GLY341, GLY342, GLY343, THR345, GLY356, PRO350, SER351                                   |
| Green  | ASN235, ASP240, MET242, LYS243, LEU247, PRO248, GLU249, ILE250                                                                                                                                                                    |

**Table S6. XM Top ligand binding pockets and their descriptions.**

| Pocket | Volume [Å <sup>3</sup> ] | Drug Score | Hydrogen bond donors | Hydrogen bond acceptors | Hydrophobic interactions | Negative amino acids | Positive Amino acids |
|--------|--------------------------|------------|----------------------|-------------------------|--------------------------|----------------------|----------------------|
| Orange | 1011.26                  | 0.81       | 23                   | 59                      | 60                       | 4                    | 4                    |
| Purple | 577.86                   | 0.78       | 11                   | 42                      | 42                       | 5                    | 5                    |
| Green  | 212.42                   | 0.41       | 3                    | 16                      | 13                       | 3                    | 1                    |

**Table S7. Pockets for XM SMT and the amino acids involved.**

| Pocket | Amino acids involved                                                                                                                                                                                                                                                                                                                                                                                          |
|--------|---------------------------------------------------------------------------------------------------------------------------------------------------------------------------------------------------------------------------------------------------------------------------------------------------------------------------------------------------------------------------------------------------------------|
| Orange | ASP110, LEU111, CYS117, PRO127, ASN130, ILE131, PHE134, THR135, ALA188, AA189, TRY190, ILE192, GLU193, ILE217, PHE218, ALA219, TRY221, GLU222, TRP223, MET225, GLY228, LYS229, TYR230, HIS237, LYS241, GLY277, VAL278, THR279, ASP280, GLN281, PRO284, VAL285, PRO286, TRP287, SER305, PHE309, ILE310, LYS313, LEU314, ILE317, LEU318, LEU342, GLY349, ILE350, PHE351, THR352, PRO353, CYS354, TYR355, PHE357 |
| Purple | LEU120, GLY121, CYS123, VAL124, PRO127, VAL142, ASN143, ASN144, HIS145, GLY170, ASP171, PHE172, ASN173, LEU175, THR191, ILE192, GLU193, ALA194, SER195, HIS197, ALA198, LYS199, ARG201, HIS203, CYS204, TYR205, GLU222                                                                                                                                                                                        |
| Green  | ASP243, ILE244, MET245, LYS246, GLY247, ASP248, GLY249, PRO251, GLU252, ILE253, LEU254, VAL321                                                                                                                                                                                                                                                                                                                |
